# Supplementary material
Source: Research Square preprint supplement (doi:10.21203/rs.3.rs-9494494/v1)
Supplement: Supplementary file 1 [file b74b5854505610b15799e029.docx]

**Appendix A PubMed search strategies (PRISMA-ScR)**

Final search date: 1 November 2025

Search strategy 1 (primary search)

(disaster*[tiab] OR emergenc*[tiab] OR "public health emergency"[tiab] OR pandemic*[tiab] OR epidemic*[tiab] OR humanitarian[tiab] OR "mass casualty"[tiab])

AND

("mental health"[mh] OR "mental health"[tiab] OR psychosocial[tiab] OR "psychosocial support"[tiab] OR "psychological first aid"[tiab] OR mhpss[tiab] OR resilience[tiab] OR "community resilience"[tiab])

AND

(preparedness[tiab] OR "disaster planning"[tiab] OR "emergency preparedness"[tiab] OR readiness[tiab] OR "capacity building"[tiab] OR training[tiab] OR response[tiab])

AND

(model*[tiab] OR framework*[tiab] OR program*[tiab] OR intervention*[tiab] OR guideline*[tiab] OR plan*[tiab] OR protocol*[tiab] OR toolkit*[tiab])

NOT (animals[mh])

Search strategy 2 (extended search)

(disasters[mh] OR disaster*[tiab] OR emergenc*[tiab] OR "public health emergency"[tiab] OR pandemic*[tiab] OR epidemic*[tiab] OR humanitarian[tiab] OR "mass casualty"[tiab] OR "civil protection"[tiab] OR "disaster risk reduction"[tiab] OR DRR[tiab] OR "Sendai Framework"[tiab] OR "surge capacity"[tiab])

AND

("mental health"[mh] OR "mental health"[tiab] OR psychosocial[tiab] OR "psychosocial support"[tiab] OR "psychological first aid"[tiab] OR PFA[tiab] OR MHPSS[tiab] OR resilience[tiab] OR "community resilience"[tiab])

AND

(preparedness[tiab] OR "emergency preparedness"[tiab] OR "disaster planning"[tiab] OR readiness[tiab] OR "capacity building"[tiab] OR training[tiab] OR response[tiab] OR "surge capacity"[tiab])

AND

(model*[tiab] OR framework*[tiab] OR program*[tiab] OR intervention*[tiab] OR guideline*[tiab] OR polic*[tiab] OR plan*[tiab] OR protocol*[tiab] OR toolkit*[tiab])

NOT (animals[mh])
